# Supplementary material for: Comparison of 3D laser-based photonic scans and manual anthropometric measurements of body size and shape in a validation study of 123 young Swiss men
Source: PeerJ. 2017 Feb 9;5:e2980. doi: 10.7717/peerj.2980 (PMC5345820; doi:10.7717/peerj.2980)
Supplement: Supplemental Information 1 [file peerj-05-2980-s001.xlsx]

## Sheet: 3D basicdata_Koepke et al_Compa
ID	S1height	S1chest	S1waist	S1buttock	S1hip	S2height	S2chest	S2waist	S2buttock	S2hip	weight	H1height	H1chest	H1waist	H1buttock	H1hip	H2height	H2chest	H2waist	H2buttock	H2hip	AgeGroup	SportClass	PhysicianVisits
1	176.4	91.1	75.3	90.4	91.3	176.4	92.6	75.3	90.4	91.5	64.9	178.6	85	74.5	79.5	90	178.5	84	74.5	79.5	87	25-29	5.0-7.4	2
2	176.1	92.4	78.7	93.5	95.6	176.1	91.1	77.9	93.3	95.2	66.8	178.2	89.3	74.5	80	87.3	177.8	88.5	76	79	88	30-34	>=7.5	2
3	177.8	99.2	84.1	104.7	107.2	177.1	109.2	84.6	104.7	107.4	81.9	179.6	#NULL!	84.6	85.5	98.8	179.6	95	83	88	100	20-24	0.6-2.4	2
4	177.9	100.4	86.4	107.4	110.8	178.6	105.8	85.8	107.1	109.5	85	179.8	98.1	85	92	104.8	179.8	99	85	93	105	20-24	5.0-7.4	2
5	177.9	94.9	78.6	92.5	94.7	178.5	93.6	78.8	92	94.3	67.1	180	91.5	78.8	80.8	89.5	180	91	77	82.5	89.5	20-24	0.6-2.4	1
6	168.1	100.9	87.6	100.9	103.1	168.2	101.5	87	100.7	103.3	73.7	170.4	99.5	85	88.5	99.7	170.5	96.5	84.5	89	98	20-24	2.5-4.9	1
7	187.6	102.4	79.5	102.1	104.2	187.3	100.8	80.3	103.1	105.1	86.9	189.8	97.6	80.2	85.8	99.2	189.7	95.5	79.5	87	97	25-29	5.0-7.4	2
8	181.9	101.4	82.3	105.3	107.5	181.1	99.5	86.4	106.2	108.6	81.2	183.5	95.8	81.2	87.2	102.5	183.4	96	79	87.5	100.5	20-24	5.0-7.4	2
9	190.5	107.7	87.9	106.2	108.8	190.5	104.4	88.5	105.3	108.4	90.9	192.5	98.7	87.5	90.1	104.5	192.2	98.5	87.8	92.3	102.9	25-29	5.0-7.4	3
10	179.4	97.6	79.6	97.1	99.5	178.6	97.6	79.7	97.7	99.7	78.7	182	94.6	78.2	81.6	88.7	180.2	93.7	78.3	82.9	92.2	20-24	0.6-2.4	>=4
11	177.8	89.2	77.1	94.3	96.6	178.6	91.2	77.2	94	96.2	65.8	181.6	87.6	75.2	81.2	92.5	181.2	89.1	77.6	84.4	92.3	15-19	>=7.5	2
12	177.8	98	86.8	97.2	100.9	177.9	97.5	85.7	97.8	100.8	72.3	179.5	91.5	82.1	87.5	93.6	179.1	96.8	84.8	90.1	92.4	30-34	5.0-7.4	1
13	176.8	88.3	76.7	96.9	95.3	176.8	87.2	77.2	96.6	98.4	67.7	178.5	86.3	76.1	81	92.1	178	88.2	76.7	83.4	91.9	25-29	2.5-4.9	2
14	171.4	98.6	77.4	95.3	97	171.4	99.3	78.1	95.6	96.9	70.5	173.8	92.1	76.7	80.9	90.4	174.1	90.5	76.3	80.5	89.5	20-24	2.5-4.9	3
15	173.2	92.2	80.1	101	103.6	173.2	92.4	78.5	100.9	103.6	72.8	175.9	89.9	76.8	82	97.8	175.9	90.1	78.7	88.8	97	20-24	5.0-7.4	2
16	172.2	100.4	88.3	94.8	96.1	173.1	102.1	86.8	94.4	95.6	71.4	173.8	96.5	85.3	89.6	93	174	97.5	85.4	87.7	94	25-29	0.6-2.4	2
17	181.1	78.3	68.7	88.8	89.5	181.9	79	68	88.4	88.8	55.5	182.8	79.5	68	79.5	85.5	183	78.8	68	76.7	84.5	25-29	0.0-0.5	1
19	180.3	103.1	84	100.1	102.9	180.4	102.8	83.9	100.6	103.9	80.1	182	95.2	81.5	84.3	99	182.3	98	83.4	86	98	20-24	2.5-4.9	2
20	181.1	90.4	70.9	88.5	89.6	181.1	89.1	71.4	88.7	89.4	57.5	183.3	82.5	71.5	77.7	80.5	182.9	83	71.1	77.2	83.3	25-29	>=7.5	1
21	167.4	90.9	72.2	88.5	88.8	166.6	89.8	71.2	88.2	89.1	57.1	170.1	82.5	72.5	72.2	87.8	169.3	84.5	71.2	72	85.3	20-24	>=7.5	2
22	176.1	93.6	75.2	95	95.3	176	92.3	75	94.5	94.9	68.3	177.1	86.7	73.3	82.7	92.9	177.2	86	74.7	81.7	89	25-29	5.0-7.4	2
23	174.6	94.1	76.6	92.6	93.8	174	94.5	77.2	92.2	93.1	68	176.8	87.9	76.8	80.8	91.5	176.5	90.4	76.7	80.6	86.5	20-24	2.5-4.9	2
24	178.6	102.5	87.5	97.1	100.4	179.2	102.7	88.7	97.1	100.7	77.8	180	96.6	85.6	94.6	91.6	179.6	94.8	86.4	93.4	88.9	20-24	0.6-2.4	2
25	174.7	89.3	75.7	90.6	92	175.4	88.1	76	89.9	84.7	57.9	176.7	88.3	75.5	77.5	87.8	176.5	86	74.5	78.6	87.5		2.5-4.9	2
26	177.1	91.2	76	96.2	96.9	177.1	90.7	75.1	95.6	96.9	64.7	179.2	84	73.8	79.5	92.6	179	87.5	75.3	81.8	91.8	30-34	0.6-2.4	2
27	175.3	101.8	86.4	103.1	104.2	175.4	102	87	103.2	104.3	82.2	176.4	93.5	82.7	89.5	96.8	176.4	95.2	84.4	89.4	96.3	20-24	0.0-0.5	1
28	174.6	96.7	75.6	88.9	89.8	175.3	97.1	74.6	88.9	89.8	64.8	177.9	91.5	74.5	75.8	88.5	177.9	94.5	74	76.7	87.8		>=7.5	2
29	178.5	95	81.5	102.2	105.1	177.9	95.9	82.5	102.6	104.9	74	179.8	91.2	79.7	83.4	92	180.1	92.5	80.6	85.4	93	25-29	2.5-4.9	1
30	176.1	105	82.5	97.3	99.3	176.1	103.7	81.8	97.1	99.4	86	178.1	95.2	79.8	78.4	88.4	178.8	101.4	80	79.3	90.3	20-24	>=7.5	3
31	181.1	113	94.6	103.4	105.4	180.8	113.8	94.7	103.6	105.7	90	182	103.5	93.2	96.8	104	182.2	105	92.6	96.2	104	20-24	5.0-7.4	2
32	193.8	97.3	78.2	97.1	98.3	193.8	96.4	79.5	96.5	97.3	77.3	196.4	92.3	76.1	79.8	91.5	196.4	92.4	76	83.7	91.6	20-24	5.0-7.4	2
33	175.4	92.1	73.7	91.8	92.6	175.3	90.7	73.2	91.3	92.6	62.5	177.4	86.5	70.3	77.9	88	177.3	88.9	71.7	77.8	88.1	20-24	2.5-4.9	2
34	164.2	89.9	73.2	91.4	94	165.6	89.3	70.8	91	93.9	61.1	166.8	81.5	70.9	77.2	89.3	167	86	71.5	74.5	88	15-19	0.6-2.4	>=4
35	181.8	91.5	76.9	94.9	95.8	181.9	88.9	76.9	94.7	95.9	68.6	183.2	87.5	76.3	78.2	91.1	183.2	88.8	77.4	81	94.3	25-29	0.6-2.4	1
37	171.4	105.2	94.9	99.6	102.8	170.6	105.3	94.6	99.5	102.7	81.7	174	101.5	91	96.5	99.6	173	104.5	92	97	100	20-24	2.5-4.9	2
38	179.2	101.7	91.8	102	103.1	180.1	102.4	89.8	102	103.3	78.2	182	99.3	87.8	87.4	100.1	181.9	98.5	90	90	101	25-29	0.6-2.4	2
39	189.8	98.9	88.2	104.6	105.9	190.5	97.5	85.7	104.8	105.9	86	191.6	97	85	90.1	103.8	191.6	97	85	88	102.4	25-29	5.0-7.4	2
40	182.6	112.4	100.9	112.6	115.6	182.6	112.3	101.1	114.3	116.6	98.3	184	109	98	103	112	184	109	98	105	113	20-24	5.0-7.4	1
41	187.6	115.8	99.3	106.8	108.8	187.3	110.9	101.6	107	108.7	96.8	189	104	96.8	105.3	107	188.6	104.9	96	103.8	106.4	30-34	5.0-7.4	1
42	172.1	100.7	77.5	90.3	92.7	172.8	101.1	76.9	90.3	93	65.6	174	98	76	76	90	173.9	100.1	76	76.2	88.9	30-34	2.5-4.9	1
43	170.7	108.2	93.6	105	108.3	170.6	107.9	94.6	104.7	108.1	81.3	172.1	104.9	93.8	97.6	102.7	172.4	100	95	95.6	103.1	25-29	5.0-7.4	2
44	188.4	89.5	75.1	93	96	189	90.5	75.9	92	95.9	69.8	189.9	87.5	76.3	82.7	91.8	189.8	90.4	77.5	80.9	93.2	25-29	5.0-7.4	3
45	193.8	100.3	76.5	99.4	102.1	194.5	98	75.9	99.3	102.2	78.4	195	94.3	76.3	81.9	96.5	195.4	96.1	78.8	82.5	97.6	20-24	>=7.5	2
46	167.4	94.2	74.8	93.6	95.7	166.7	95.9	76.9	93.9	96.3	65.2	169.4	91.2	75.1	75.2	91.3	169.6	92.4	76.3	76.3	92.3	25-29	2.5-4.9	2
47	192.3	95.9	75.2	94.2	96	192	96	78.4	93.7	95.9	72.7	194.3	91.3	79	80.7	93.2	194.1	92.8	78.2	80	93.8	20-24	0.6-2.4	3
48	177.9	101.4	83.2	98.3	99.9	177.9	100.8	82.2	97.8	99.9	78.8	180.4	96.1	82.2	84.3	96.3	180.2	97.5	83.6	85	97.4	20-24	>=7.5	2
49	172.9	96.5	78.4	94.8	96.7	172.8	99.2	79.2	94.8	97.2	69.4	174.4	90.4	77.2	82.9	93.6	174.5	93.2	78.4	79.5	94.4	20-24	2.5-4.9	3
50	175.3	93.9	83.6	97.8	101.5	175.3	93.9	83.6	98.5	101	75.2	178.4	93.7	83.3	87.2	97.8	178	95.8	83.4	88.5	99	20-24	0.0-0.5	1
51	172.8	95.2	74.8	94.7	95.2	172.9	93.2	73.7	94.9	95.5	67.1	175.4	88.5	74.5	80.9	93.7	175.2	95.2	74.9	77.7	93.1	15-19	0.6-2.4	1
52	178.5	88.3	73.6	89.5	90.5	178.7	87.9	74.8	89	89.6	62.1	181	85.5	74	78.4	88.5	180.8	87.2	76	75.5	88.5	20-24	5.0-7.4	1
53	176.1	104	80.3	94.7	97.2	177.2	103.1	80.4	95.4	97.5	73.9	178.2	98.7	80	86.1	93.6	178.4	97.8	82	86.5	94.8	25-29	5.0-7.4	1
54	182.6	96.4	85.4	98.1	99.4	182.5	95.9	84.9	98.2	99.7	77.4	184.6	96	82.2	90.4	96.4	184.5	96.5	83.6	90	96.4	20-24	0.6-2.4	3
55	183.4	96.5	85.5	98.8	99.3	183.4	98.7	85.1	98.8	99.3	74.4	185.1	96.9	86.8	85.1	96	185.4	95.4	82.5	83	97.5	25-29	0.0-0.5	2
56	177.9	106.2	94.7	100.3	101	178.5	106.4	94.9	99.8	100.7	79.9	180.4	102.3	90.3	97.3	97.5	181	101	91	95	100	30-34	0.6-2.4	1
57	176.4	91.3	72.8	90.3	91.3	175.4	90.2	73.3	90.4	91.3	58.7	177.8	87.2	73.8	81.1	90.2	177.7	84.8	72.7	81.2	89.9	25-29	0.6-2.4	1
59	179.3	101.5	84.2	96.2	97.7	178.6	100.4	84.4	96.7	98.6	72.3	181.5	96.8	82.3	88.2	96.5	181	94.5	82.5	88.7	96.3	35-40	2.5-4.9	2
60	188.3	104.3	85.1	98.6	100.7	188.3	105.6	85.1	98.2	100.5	84.7	190.9	102.9	83.9	85.8	96	191.2	102.4	84.7	85.3	95.2	15-19	5.0-7.4	2
61	183.3	111.4	93.2	105.9	108.8	182.6	109.6	93.8	105.5	108.6	89.8	185.8	105.5	90.5	91	104.5	185.8	105.4	90.4	94.1	105.1	35-40	2.5-4.9	2
62	188.4	108.2	91.9	105.6	108	189	108.5	90.8	106	108.5	93.7	191.6	104.7	90.2	92.3	102.8	191.5	107.2	91.7	92.2	104.5	30-34	2.5-4.9	1
64	173.9	91.1	78.8	92.8	94.2	174	90.9	78.2	92.3	93.8	67.2	175.5	88.5	76.2	78.2	90	175.7	88.4	76.6	78.9	89.1	25-29	0.6-2.4	1
65	181.9	93.1	72.5	91.4	94.1	180.1	92.1	73.5	91.3	93.9	64.8	184	87.3	72.5	73.7	88.2	184.1	89.1	70.4	74	89	15-19	0.6-2.4	2
66	170.7	91.7	81	97	99.3	171.4	90.9	79.5	96.7	99.9	67.7	173.6	89.2	76.8	84.5	95.3	173.5	88.6	76.5	79.2	96.8	20-24	0.0-0.5	1
67	171.4	90.7	76.2	91.8	94.4	171.3	90.3	75.3	91.3	94	61.2	173.5	83.5	75.2	75.2	90.3	173.7	87.7	75.5	76.8	89.9	20-24	5.0-7.4	1
69	178.5	101	91.4	107	109.2	178.6	103.5	92.3	105.7	108.9	88.4	180.3	99.1	89	95.3	104.3	180.5	101.4	90.6	97.3	108.3	30-34	2.5-4.9	>=4
70	183.6	97.8	96.8	103.3	103.2	183.3	97.3	96.5	102.9	102.9	87.4	188.7	95.3	93.2	95.5	101.2	186.9	95.5	92.9	95.9	101	25-29	0.0-0.5	2
71	166.7	99.8	81.8	97.6	99.5	167.4	101.9	81.4	98	100.5	71.7	170.2	95.2	79.3	81.3	93	170.1	96.5	81	83	96	25-29	2.5-4.9	2
72	177.1	87.9	78.2	93.1	95	177.2	88.8	78.1	92.7	95.3	66.4	180.9	87.2	74.3	78.5	91.6	180.4	85.4	75.4	72.1	91.6	25-29	2.5-4.9	1
73	177.9	102.4	79.8	98.7	100.7	177.1	98.9	80.2	100.4	101.7	75.5	179.4	94	79.2	80.7	95.2	179.7	94.7	79.1	81.6	90.2	30-34	0.6-2.4	1
74	178.7	87.5	70.2	93.5	95.3	178.5	88.5	70.1	90.1	93.1	#NULL!	#NULL!	#NULL!	#NULL!	#NULL!	#NULL!	#NULL!	#NULL!	#NULL!	#NULL!	#NULL!	25-29	2.5-4.9	1
75	173.9	92.3	79	99.3	99.3	173.9	92.8	77.1	99.4	99.7	69.3	175.1	89.5	76.3	77.5	92.8	175.2	90.2	72.9	70.2	93.3	25-29	>=7.5	1
76	170.7	101.9	86.4	99.1	100.9	170.7	101.2	87	99.5	101.4	78.9	171.6	96.5	82.8	85.3	94.9	172.1	96	83.5	92.5	98.1	25-29	2.5-4.9	1
77	176	92.2	75.9	92.9	93.7	176.1	90.4	75.5	92.9	93.6	64.3	178.3	89.2	75.5	78.2	90.2	178.1	92.5	76.5	87.5	90.9	25-29	5.0-7.4	3
78	183.3	105.3	85.7	106.3	109.1	183.6	103	85.3	105.9	108.3	87.6	185.4	101.2	84.9	99.5	105.1	185.1	99.9	84.1	90.7	101.5	20-24	5.0-7.4	2
79	187.6	101.6	83	101.2	103.6	187.3	104.4	81.6	101.4	103.7	80.8	190.8	100.3	79.4	82.4	97.5	190.6	101	80.1	87.1	98.1	20-24	2.5-4.9	1
80	177.9	96.5	75.9	89.1	92	177.8	95.9	74.7	88.9	92.1	64.4	180.6	86.3	74.5	78.3	87.7	180.4	87.7	76.4	79.5	88	20-24	5.0-7.4	1
81	184.3	112.5	88.6	102.6	105.6	183.3	114.1	89	102.5	104.9	85.8	186	105.5	88.2	94.5	101.5	186.1	107	88.6	95.9	101	20-24	2.5-4.9	1
82	178.5	105.1	91.9	104.8	105.8	178.6	104.2	91.5	102.8	105.5	86	181.7	99.3	86.5	91.5	102	181	100.7	86.7	95.3	100.3	20-24	2.5-4.9	2
83	189	104.2	83.3	102.4	104.3	189.1	105.5	83.5	102.2	104.9	83.8	190	97.2	82.3	86.5	100.2	190.1	98.9	84.5	92.9	100.9	20-24	2.5-4.9	1
84	171.3	97.1	82.7	95.5	97.6	171.3	94.8	81.7	95.9	97.4	69.8	172.8	90.5	79.5	92.5	94.2	173.2	92.8	78.8	84	93	20-24	0.6-2.4	1
86	188.3	100.3	84	105.8	108.6	187.3	100.7	84.6	105.3	107.9	85.5	189.9	94.8	84.8	88.8	103.1	188.8	96.5	84.5	91.2	100.8	20-24	>=7.5	2
87	187.3	98.1	79.2	100.1	101.1	187.3	97.7	79	100.1	101.2	78.3	189.8	93.8	78.5	84.6	98	189.6	94.5	79.1	86.5	99.7	20-24	>=7.5	2
88	172.2	94.1	77.1	94.4	97.5	172.1	95	76.7	94.6	97.4	66.3	172.5	88.4	76.2	81.5	89.4	172.4	88.1	74.8	82.9	92.1	20-24	2.5-4.9	2
89	176.1	90.4	73.7	89.8	93.4	176.1	91.5	73.3	89.4	93.2	64.9	178	85	72.6	78.6	86.7	177.9	86.4	73.4	79.1	84.4	20-24	2.5-4.9	2
90	174.6	96.9	75.8	94.5	96.1	174.6	96.1	77.6	94.3	95.8	70.6	176.9	95.4	75.6	76.3	92.2	177.1	97.2	76.9	83	94.2	20-24	5.0-7.4	2
91	187.3	97	82.5	98.7	101.1	187.6	96.9	85	98.7	101	77.1	188.2	91.8	82.5	92.4	96.7	187.9	91.6	81.9	90	96.2	20-24	0.6-2.4	2
92	177.8	100.4	76.7	94.2	96	177.8	97.9	77.2	94.3	96.2	73	178.6	96.4	77.2	80.3	91.9	178.3	95.7	77	80.5	91	20-24	2.5-4.9	3
93	184.1	101.9	86.7	100.8	103.8	185	101.5	86.9	101	104	79.4	186.6	100.4	85.3	92	98.8	186.6	99.4	85.7	90.9	93	20-24	>=7.5	1
94	185.2	102.7	85.9	106.3	109.3	185.2	102.2	84.9	105.6	109.3	88.2	188	94.8	83.1	93.2	103.4	188.4	99.8	83.5	90.6	100.5	20-24	2.5-4.9	2
95	172.8	107.1	91.6	104.7	108.1	173.2	105.5	92.3	104.5	107.3	80.6	176.5	100.3	88.5	95.2	101.6	176.7	103.8	86.6	91.9	98.8	20-24	2.5-4.9	1
96	178.6	93.7	74.7	93.9	95.5	179.4	95	75	93.1	95.3	72.5	181.2	92.1	75	79	91	181.8	93	74.8	80.6	93	20-24	5.0-7.4	2
97	170.7	91.4	71.3	89.5	91.2	170	89.9	70.4	89.8	90.7	60.8	171.4	86.8	71.3	74.9	86.8	171.1	88	72.1	73.9	86.4	20-24	>=7.5	1
98	182.6	96.4	81	100.4	102	182.6	96.1	80.1	99.8	101.5	77.4	183.2	94	78.5	85.3	97.5	183.2	94.8	79.6	86.5	99.5	25-29	2.5-4.9	3
99	174.6	89.8	77.2	90.2	92.5	175.4	90.7	76.6	90.4	92.2	63.6	177.2	88.5	75.9	81.4	87.5	177.4	88.5	77.8	81	88	30-34	0.6-2.4	3
100	177.9	94.6	78.5	97.4	99.4	177.9	93.1	79.5	96.5	99.1	74.4	182	93.8	78.5	84.2	93.4	181.4	93.2	79.5	89.2	96.4	25-29	0.6-2.4	3
101	170.6	98.5	75.8	93.4	94.7	170.6	98.3	76.6	93.2	94.7	69.3	172	91	75.9	76.6	91	172.5	92.1	76.2	82.3	92.2	20-24	5.0-7.4	1
102	175.4	84	69.3	88.6	90	175.3	85.5	69.8	88.4	90.1	58	177.4	82.8	70	74.6	84.8	176.8	84.5	70.4	75.3	86.6	20-24	0.6-2.4	2
103	176.8	98.5	79.5	93.1	94.4	177.2	99.9	79.6	93.3	94.9	70.6	177.2	93.5	78.1	80.3	92.3	177.1	93.5	78.7	81.2	92.2	30-34	0.6-2.4	1
104	185.1	94.5	80.7	94.3	96.6	185.1	95.7	79.9	94	95.6	78.1	187.5	95.4	79.9	82.3	93.5	187.5	93.6	79.8	82.5	94.3	20-24	2.5-4.9	2
105	183.3	98.3	80.9	99	100.6	183.3	98.7	80.7	98.9	100.5	77.6	185.5	96.2	80.8	84.4	95.5	185.4	97.8	80.8	82.8	98.4	20-24	5.0-7.4	2
106	166.7	93.5	76.2	89.7	91.3	166.6	93.2	75.5	90.7	92.5	63.8	168	90.9	75.4	76.5	87.9	167.7	88	74.6	77.7	88.8	25-29	0.6-2.4	1
107	185	105.4	91.1	103.4	105	185.1	106.6	90.7	103.1	104.6	86	186.1	102.5	88	97.2	101.2	185.7	101.5	86.1	92.3	100.3	20-24	5.0-7.4	2
108	183.3	97.6	81.7	98	100.2	183.4	93.4	80	98.3	100.3	71.8	184.3	90.5	79.7	82.2	93.7	184.5	92.1	80.3	83.4	95.1	30-34	0.6-2.4	1
109	174.7	97.8	83.2	96.7	98.8	175.3	97.2	82.1	97.1	98.7	71.1	176.6	91.2	79.7	84.5	92.5	177.5	92.4	82	85.2	92.5	20-24	2.5-4.9	>=4
110	176.4	95.6	87.3	97	99.7	176.8	100.2	82.5	96.8	99.3	73.3	179.1	95	82.5	86.5	95.9	179.2	94.5	83	88.5	95	20-24	0.6-2.4	2
113	168.8	93.6	76.1	93.2	95.4	168.8	93.9	76.8	93	95.5	64.9	171.1	86.4	76	77.5	86.3	171.4	88.7	76.6	78.9	90.5	20-24	0.6-2.4	1
114	194.8	107.6	87.2	103.5	106.3	195.5	106.4	86.4	103.3	106.2	91.7	196.1	103.9	87.1	91.5	102.1	196.4	104	88	95.2	101.6	20-24	2.5-4.9	1
115	183.2	107.4	95.4	110.6	113.5	183.4	107.9	95.5	109.7	113.3	92.6	184	109.2	92.5	98	107.3	183.8	102.9	93.8	99.2	108.1	25-29	0.6-2.4	1
116	188.4	98.1	73.3	94.7	96	187.3	95.1	73.6	94.4	95.9	72.5	189.3	92.1	73.8	77.4	92.6	189.6	90.5	72.7	81	94.2	20-24	0.0-0.5	2
117	173.9	96.6	82.1	99.1	102.4	174.6	96.4	80.9	99.2	102	76.7	176.1	94	81.2	83.4	99	176.6	94.5	80.6	88.2	99	20-24	2.5-4.9	3
118	180	97.1	73.8	97.7	100.5	180.4	97.4	73	98.2	101.1	70.7	181.9	95.5	72	75.5	93.4	182.5	95.8	73.8	77.3	97.5	20-24	0.6-2.4	1
120	173.2	92	77.2	93.4	94.8	173.8	91.2	79.4	93.5	94.8	63.1	175.2	87.8	76.6	78.9	90.9	175.3	91.2	76.5	79.9	92.2	20-24	5.0-7.4	2
121	181.1	92.6	80.8	97.3	98.1	181.2	92.8	79.1	97.8	97.9	72.7	184.4	90	79.4	81.5	93.8	184.3	93	80	82.9	96.8	20-24	0.6-2.4	1
122	183.3	90.8	81	94.7	96	183.4	90.6	79.5	94.5	95.6	71.3	185.7	89.7	81.1	82.9	92.6	185.4	87.4	81.3	86.5	94.5	20-24	0.6-2.4	1
123	172.1	96.8	77.1	91.8	93	172.4	96.7	76.6	91.1	93.2	65.2	175.7	91.6	76.5	76.1	88.1	175.9	91.5	78.5	76.8	90.2	20-24	2.5-4.9	1
125	176.1	110.7	98.4	104.3	105.9	176.1	112.8	98.2	103.2	104.4	89	178.8	106.4	94.9	103.8	103.8	179	108.5	96	103	105	20-24	2.5-4.9	3
126	178.5	100	78.2	94.6	97.9	179.3	98.5	78.2	94.9	98.1	71.1	180.7	92.9	78.8	81	93.9	180.6	95.4	79.4	86.3	95.2	20-24	0.6-2.4	2
127	175.3	96.8	79.2	95	97.7	174.7	97.2	79.9	95.2	97.7	70.5	176	93.6	79.8	81.2	93.2	176.1	94.2	81.5	85.8	95.5	20-24	2.5-4.9	1
128	173.9	100.2	85.2	92.1	94.2	174.7	99.8	84.4	91.5	93.1	72.1	177.3	97.2	83.2	83.7	92.4	177.4	98.2	84.5	84.7	92.5	35-40	0.6-2.4	3
129	168.9	101.1	85	95.5	96.4	168.9	100.1	85.4	95.1	96.2	72	172.2	98.9	83.1	84.9	94.1	171.8	99	85	86.2	94.8	20-24	0.6-2.4	1
130	165.6	92	79.5	89.2	89.7	165.7	93	78.7	89.3	90	58.3	166.5	89.2	76	75.5	86.5	166.9	89.5	77.5	77	88	25-29	5.0-7.4	1
131	185.9	95.1	79.5	101.1	102.8	184.1	93.6	82.3	101.9	103.1	77.3	187.2	89.8	78.7	82.1	97.8	188.5	93.9	79.6	80.7	99	20-24	0.6-2.4	1
132	177.8	98.1	81.2	98.5	101.8	176.9	96.5	80.5	99.2	102.5	73.9	180	90.8	78.8	84.4	97.2	179.6	91.4	78.5	84.1	94.8	20-24	5.0-7.4	1
134	165.9	88.7	73.9	94	94.4	166	88.4	74.4	93.9	94.3	62.1	166.8	83.5	74.5	77.2	89.1	166.7	83.5	74.5	78.2	92.8	25-29	>=7.5	1
