# Supplementary material for: Comparison of 3D laser-based photonic scans and manual anthropometric measurements of body size and shape in a validation study of 123 young Swiss men
Source: PeerJ. 2017 Feb 9;5:e2980. doi: 10.7717/peerj.2980 (PMC5345820; doi:10.7717/peerj.2980)
Supplement: Table S1 [file peerj-05-2980-s002.xlsx]

## Sheet: AppendixTab
	WHR						WC						WHtR						BMI
	mMM			mAM			mMM			mAM			mMM			mAM			mMM			mAM
	Coef.	SE	p	Coef.	SE	p	Coef.	SE	p	Coef.	SE	p	Coef.	SE	p	Coef.	SE	p	Coef.	SE	p	Coef.	SE	p
Sport
0.0-0.5	-0.0072355	0.0142793	0.613	0.0080827	0.0171523	0.638	0.778601	2.56239	0.762	1.74878	2.88396	0.546	-0.0001792	0.013914	0.99	0.0056981	0.0160579	0.723	0.253464	0.990503	0.799	0.348997	1.01436	0.731
0.06-2.49	reference category
2.5-4.9	-0.0014952	0.0083442	0.858	-0.0001464	0.0099366	0.988	1.87548	1.51087	0.217	1.99761	1.68245	0.238	0.0111172	0.0081308	0.174	0.0124076	0.0093026	0.185	1.29647	0.578809	0.027	1.36117	0.59275	0.024
5.0-7.4	-0.0049989	0.0087397	0.569	-0.0001135	0.0105002	0.991	1.67393	1.58436	0.293	1.9862	1.78383	0.268	0.0065271	0.0085161	0.445	0.0076165	0.0098303	0.44	1.00352	0.60624	0.101	0.990945	0.620841	0.113
>=7.5	-0.0093351	0.0111368	0.404	-0.0223494	0.0133801	0.098	-2.09635	2.00503	0.298	-2.4259	2.2573	0.285	-0.0118898	0.0108519	0.276	-0.0141811	0.0125264	0.26	-0.200218	0.772521	0.796	-0.235651	0.791127	0.766
Physcian
1	reference category
2	-0.0021227	0.0070696	0.765	0.000946	0.008459	0.911	-0.0064292	1.28729	0.996	0.435604	1.44125	0.763	-0.0022554	0.0068888	0.744	-0.0002515	0.0079193	0.975	0.129103	0.490394	0.793	0.145189	0.502205	0.773
3	0.0017768	0.010137	0.861	0.0015214	0.0121327	0.9	-0.388898	1.8264	0.832	-0.564585	2.04715	0.783	-0.0056418	0.0098777	0.569	-0.0067328	0.0113586	0.555	0.138243	0.703167	0.845	0.174822	0.720103	0.809
>=4	-0.0007436	0.0181386	0.967	-0.0088319	0.021776	0.686	0.158002	3.2601	0.961	0.699172	3.66622	0.849	0.0073399	0.0176746	0.679	0.0100652	0.0203866	0.623	1.42095	1.25821	0.261	1.42003	1.28852	0.273
Age
15-19	-0.0208778	0.0162849	0.203	-0.0192369	0.0195581	0.328	-3.80051	2.92492	0.197	-4.28609	3.29089	0.196	-0.0214382	0.0158683	0.18	-0.0223882	0.0183103	0.224	-1.47332	1.12963	0.195	-1.32771	1.15684	0.254
20-24	reference category
25-29	0.0018754	0.0073925	0.8		0.0087748	0.904	-0.582862	1.32685	0.661	-0.998187	1.47615	0.5	0.0001476	0.0072034	0.984	-0.002703	0.008215	0.743	-0.51132	0.512795	0.321	-0.578291	0.525146	0.273
30-34	0.0188718	0.0108767	0.086	0.026119	0.0130671	0.048	2.08145	1.97357	0.294	3.05114	2.22113	0.172	0.0106954	0.0105985	0.315	0.014756	0.0122334	0.23	0.287067	0.754479	0.704	0.226662	0.772651	0.77
35-40	0.0279897	0.0203166	0.171	0.0553016	0.024409	0.025	5.24476	3.64625	0.153	6.06699	4.1053	0.142	0.0243155	0.0197968	0.222	0.03098	0.0228517	0.178	0.480254	1.40929	0.734	0.64824	1.44323	0.654
HeightCatN
<175.0							-1.84223	1.3304	0.169	-1.39039	1.48741	0.352
>=175 to <185	reference category
>=185.0							1.92282	1.588	0.229	1.66564	1.78603	0.353
Constant	0.84877	0.0074027	0				79.8196	1.42118	0	80.4959	1.59797	0	0.443067	0.0072134	0	0.452716	0.0083261	0	22.1712	0.513502	0	22.669	0.52587	0
N	119			120			119			120			119			120			119			119
R2	0.0832			0.1275			0.1442			0.1379			0.1007			0.1037			0.113			0.1137
R2 adj	-0.0111			0.0386			0.0382			0.0322			0.0083			0.0124			0.0218			0.0226
